# Supplementary material for: Cell-of-origin classification using the Hans and Lymph2Cx algorithms in primary cutaneous large B-cell lymphomas
Source: PubMed Central journal article supplement (PMC8990933; doi:10.1007/s00428-021-03265-5), 2022-01-14
Supplement: 428_2021_3265_MOESM1_ESM.pdf [file 428_2021_3265_MOESM1_ESM.pdf]

## SUPPLEMENTAL INFORMATION

### Cell-of-origin classification using the Hans and Lymph2Cx algorithms in primary cutaneous large B-cell lymphomas

#### Virchows Archives

Anne M. R. Schrader<sup>1</sup>, Ruben A. L. de Groen<sup>2</sup>, Rein Willemze<sup>3</sup>, Patty M. Jansen<sup>1</sup>, Koen D. Quint<sup>3</sup>, Tom van Wezel<sup>1</sup>, Ronald van Eijk<sup>1</sup>, Dina Ruano<sup>1</sup>, Cornelis P. Tensen<sup>3</sup>, Esther Hauben<sup>4</sup>, F.J.S.H. (Sherida) Woei-A-Jin<sup>5</sup>, Anne M. Busschots<sup>6</sup>, Anke van den Berg<sup>7</sup>, Arjan Diepstra<sup>7</sup>, Maarten H. Vermeer<sup>3</sup>, and Joost S. P. Vermaat<sup>2</sup>

*<sup>1</sup>Department of Pathology, <sup>2</sup>Department of Hematology, and <sup>3</sup>Department of Dermatology, Leiden University Medical Center, Leiden, The Netherlands; and <sup>4</sup>Department of Pathology, <sup>5</sup>Department of General Medical Oncology, <sup>6</sup>Department of Dermatology, University Hospitals Leuven, Leuven, Belgium, and <sup>7</sup>Department of Pathology, University Medical Center Groningen*

#### Corresponding author:

Anne M. R. Schrader, MD PhD

E-mail address: [a.m.r.schrader@lumc.nl](mailto:a.m.r.schrader@lumc.nl)



**Supplemental Figure 1. OncoPrints of the molecular alterations identified with the LYMFv1 targeted next-generation sequencing panel (52 B-cell lymphoma-relevant genes) and fluorescence *in situ* hybridization for *MYC* for 47 patients with PCDLBCL-LT (1A) and 11 patients with PCFCL-LC (1B).** The majority of PCDLBCL-LT harbored a mutation in NFκB-related genes, i.e. *MYD88* (77%), *CD79B* (47%), and *PIM1* (40%). Other recurrent alterations were loss of *CDKN2A* (62%) or a rearrangement of *MYC* (17%). Cell-of-origin (COO) classification assigned the majority (75%) of PCDLBCL-LT to the non-GCB subtype with the Hans algorithm and mostly to UI (43%) or GCB (39%) with the Lymph2Cx algorithm. The cohort of PCFCL-LC demonstrated frequent mutations in *GNA13* (27%), *CREBBP* (27%), and *EZH2* (27%). All PCFCL-LC cases were classified as GCB by both Hans and Lymph2Cx. All PCFCL-LC patients were alive at last follow-up compared with only 45% of the PCDLBCL-LT patients; 32% of the PCDLBCL-LT patients died disease-related and 23% died disease-unrelated.

*Abbreviations: COO, cell-of-origin; GCB, germinal center B-cell-like subtype; ABC, activated B-cell-like subtype; UI, unclassified/intermediate.*
